# Supplementary material
Source: PubMed Central journal article supplement (PMC4379462)
Supplement: peds.2014-3060_peds.2014-3060SupplementaryData.pdf [file peds.2014-3060_peds.2014-3060SupplementaryData.pdf]

## Supplemental Information 1

### LRI ASCERTAINMENT DURING EARLY LIFE

During the first 3 years of life, parents were instructed to take their children to their pediatricians whenever the children had any of the following symptoms:

deep or “wet” chest cough, wheezing, hoarseness, stridor, barking cough, or shortness of breath. Pediatricians obtained a detailed history at the time of such illnesses and recorded all relevant signs and symptoms (including wheezing on auscultation) on a study

form. The study nurses working in the pediatrician's office obtained additional historical information.<sup>37</sup> Of the original 1246 children enrolled in the study, 888 were followed for LRIs by the original study pediatricians for the entire first 3 years of life.

## Supplemental Information 2

### LUNG FUNCTION ASSESSMENTS

Spirometry was performed at ages 11, 16, and 22 years by using a portable Schiller Spirovit SP-1 (Schiller AG, Baar, Switzerland)<sup>38</sup> or at age 26 years by using the KoKo Legend portable spirometer (Ferraris Respiratory, Louisville, CO). Testing equipment met American Thoracic Society guidelines for spirometry. None of the participants had used a bronchodilator within 6 hours of testing. Study nurses recorded height, weight,

and age at the time of testing. Subsequent to baseline measurements, a fixed dose of albuterol, 2 puffs (180  $\mu\text{g}$ ) at ages 11, 16, and 22 years or 4 puffs (360  $\mu\text{g}$ ) at age 26 years, was administered from a metered-dose inhaler and aerochamber holding device (Monaghan Medical, Plattsburgh, NY), with post-bronchodilator spirometry obtained after 15 minutes.

All best-fitting models included age, gender, height, race/ethnicity, LRIs, cur-

rent smoking, current wheeze, current physician-diagnosed asthma, maternal history of physician-diagnosed asthma, maternal smoking, and paternal smoking. The number of observations for the prealbuterol FEV<sub>1</sub> model was 1571; the number of individuals included in the analysis was 624, with an average number of observations per individual of 2.5. B, model coefficient; Ref, reference group in the model.

**SUPPLEMENTAL TABLE 5** Number of Episodes of LRIs During the First 3 Years of Life

| Number of LRI Episodes | LRIs      |            | Total |
|------------------------|-----------|------------|-------|
|                        | Pneumonia | Other LRIs |       |
| 1                      | 20        | 180        | 200   |
| 2                      | 9         | 69         | 78    |
| 3                      | 8         | 30         | 38    |
| 4                      | 5         | 7          | 12    |
| 5                      | 1         | 8          | 9     |
| 6                      | 1         | 0          | 1     |
| Total                  | 44        | 294        | 338   |

**SUPPLEMENTAL TABLE 6** Best-Fitting Multivariate Longitudinal Random-Effects Models for Lung Function From Ages 11 Through 26 Years and LRIs During the First 3 Years of Life

| LRIs                                | FEV <sub>1</sub> (mL) |      | FVC (mL)       |      | FEV <sub>1</sub> :FVC Ratio (%) |       | FEF <sub>25-75</sub> (mL/s) |      | FEF <sub>25-75</sub> :FVC Ratio (%) |      |
|-------------------------------------|-----------------------|------|----------------|------|---------------------------------|-------|-----------------------------|------|-------------------------------------|------|
|                                     | B (SE)                | P    | B (SE)         | P    | B (SE)                          | P     | B (SE)                      | P    | B (SE)                              | P    |
| Prealbuterol lung function at ages  |                       |      |                |      |                                 |       |                             |      |                                     |      |
| 11–26 years                         |                       |      |                |      |                                 |       |                             |      |                                     |      |
| No LRI                              | Ref                   |      | Ref            |      | Ref                             |       | Ref                         |      | Ref                                 |      |
| Pneumonia                           | −78.77 (56.84)        | .166 | 66.86 (66.34)  | .314 | −3.30 (0.94)                    | <.001 | −345.88 (117.37)            | .003 | −10.67 (3.21)                       | .001 |
| Other LRIs                          | −57.66 (28.26)        | .041 | −14.71 (32.99) | .656 | −1.13 (0.47)                    | .015  | −161.31 (58.36)             | .006 | −4.35 (1.60)                        | .006 |
| Postalbuterol lung function at ages |                       |      |                |      |                                 |       |                             |      |                                     |      |
| 11–26 years                         |                       |      |                |      |                                 |       |                             |      |                                     |      |
| No LRI                              | Ref                   |      | Ref            |      | Ref                             |       | Ref                         |      | Ref                                 |      |
| Pneumonia                           | −17.65 (55.07)        | .749 | 81.84 (66.32)  | .217 | −1.83 (0.79)                    | .020  | −241.21 (113.79)            | .034 | −7.27 (3.16)                        | .022 |
| Other LRIs                          | −33.33 (27.61)        | .227 | −8.60 (33.26)  | .796 | −0.67 (0.40)                    | .092  | −124.45 (57.07)             | .029 | −3.52 (1.59)                        | .026 |
